# Supplementary material
Source: PubMed Central journal article supplement (PMC7522778)
Supplement: jamapediatr-e202893-s002.pdf [file jamapediatr-e202893-s002.pdf]

## Supplementary Online Content

Logan K, Perkin MR, Marrs T, et al. Early gluten introduction and celiac disease in the EAT Study: a prespecified analysis of the EAT randomized clinical trial. *JAMA Pediatr*. Published online September 28, 2020. doi:10.1001/jamapediatrics.2020.2893

### **eTable.** Baseline Characteristics of the Cohort

This supplementary material has been provided by the authors to give readers additional information about their work.

**eTable Baseline characteristics of the cohort**

| Demographics and clinical assessment at trial enrolment |                  | <b>SIG</b><br>% (n/N)               | <b>EIG</b><br>% (n/N)               |
|---------------------------------------------------------|------------------|-------------------------------------|-------------------------------------|
| <b>Number in group</b>                                  |                  | 516                                 | 488                                 |
| <b>Demography</b>                                       |                  |                                     |                                     |
| Median age at enrolment (weeks):                        |                  | 14.7 (n=516)<br>(range 12.9 – 18.0) | 14.7 (n=488)<br>(range 12.9 – 18.0) |
| Sex:                                                    | Male             | 51.7 (267/516)                      | 50.6 (247/488)                      |
|                                                         | Female           | 48.3 (249/516)                      | 49.4 (241/488)                      |
|                                                         |                  |                                     |                                     |
| Ethnicity:                                              | White            | 84.3 (435/516)                      | 87.1 (425/488)                      |
|                                                         | Black            | 2.5 (13/516)                        | 2.5 (12/488)                        |
|                                                         | Asian            | 1.6 (8/516)                         | 2.0 (10/488)                        |
|                                                         | Chinese          | 0.4 (2/516)                         | 1.0 (5/488)                         |
|                                                         | Mixed            | 11.2 (58/516)                       | 7.4 (36/488)                        |
|                                                         |                  |                                     |                                     |
| Home location:                                          | Urban            | 76.0 (392/516)                      | 78.5 (383/488)                      |
|                                                         | Rural (non-farm) | 21.9 (113/516)                      | 18.0 (88/488)                       |
|                                                         | Rural (farm)     | 2.1 (11/516)                        | 3.5 (17/488)                        |
|                                                         |                  |                                     |                                     |
| Maternal education:<br>(age at completion)              | ≤16              | 6.6 (34/516)                        | 3.3 (16/488)                        |
|                                                         | 17-18            | 13.4 (69/516)                       | 12.5 (61/488)                       |
|                                                         | >19              | 80.0 (413/516)                      | 84.2 (411/488)                      |
|                                                         |                  |                                     |                                     |
| Median maternal age (years):                            |                  | 33 (n=516)<br>(range 20 – 46)       | 34 (n=488)<br>(range 19 – 45)       |
|                                                         |                  |                                     |                                     |
| Siblings                                                | 0                | 39.1 (202/516)                      | 37.9 (185/488)                      |
|                                                         | 1                | 36.6 (189/516)                      | 38.7 (189/488)                      |
|                                                         | 2                | 16.9 (87/516)                       | 15.6 (76/488)                       |
|                                                         | 3+               | 7.4 (38/516)                        | 7.8 (38/488)                        |
|                                                         |                  |                                     |                                     |
| Mean birth weight grams<br>(SD)                         |                  | 3544 (n=516)<br>(480)               | 3570 (n=488)<br>(487)               |
| Mode of delivery:                                       | Vaginal          | 75.6 (390/516)                      | 72.4 (352/488)                      |
|                                                         | Caesarean        | 24.4 (126/516)                      | 27.6 (136/488)                      |
| Mean gestational age weeks (SD)                         |                  | 39.7 (1.3)                          | 39.9 (1.3)                          |
