# Supplementary material
Source: PubMed Central journal article supplement (PMC7522778)
Supplement: jamapediatr-e202893-s003.pdf [file jamapediatr-e202893-s003.pdf]

## Data Sharing Statement

Logan. Early Gluten Introduction and Celiac Disease in the EAT Study. *JAMA Pediatr*. Published September 28, 2020.  
10.1001/jamapediatrics.2020.2893

### Data

**Data available:** Yes

**Data types:** Deidentified participant data, Data dictionary

**How to access data:** <https://www.itntrialsshare.org>

**When available:** With publication

### Supporting Documents

**Document types:** None

### Additional Information

**Who can access the data:** Data will be publicly available

**Types of analyses:** Any

**Mechanisms of data availability:** Online
